# Supplementary material for: Moderate-vigorous physical activity attenuates premature senescence of immune cells in sedentary adults with obesity: a pilot randomized controlled trial
Source: publisher site journal article supplement (doi:10.18632/aging.204458), 2022-12-29
Supplement: Supplementary file [file aging-v14i24-204458-supplementary-material-SD2.pdf]

## SUPPLEMENTARY TABLE

Supplementary Table 1. Primers used in the present study.

| Primers                   | 5' to 3'                |
|---------------------------|-------------------------|
| p16 <sup>INK4a</sup> _Fwd | GGGGGCACCAGAGGCAGT      |
| p16 <sup>INK4a</sup> _Rev | GGTTGTGGCGGGGGCAGTT     |
| p21 <sup>Cip1</sup> _Fwd  | CCGCCCCCTCCTCTAGCTGT    |
| p21 <sup>Cip1</sup> _Rev  | CCCCATCATATACCCCTAACACA |
| TNF- $\alpha$ _Fwd        | CCTGCCCCAATCCCTTTATT    |
| TNF- $\alpha$ _Rev        | CCCTAAGCCCCCAATTCTCT    |
| IL-1 $\beta$ _Fwd         | TCCAGGGACAGGATATGGAG    |
| IL-1 $\beta$ _Rev         | TCTTTCAACACGCAGGACAG    |
| IL-6_Fwd                  | AATAACCACCCCTGACCCAAC   |
| IL-6_Rev                  | AATCTGAGGTGCCCATGCTAC   |
| GAPDH_Fwd                 | TCTTCTTTTGCCTCGCCAG     |
| GAPDH_Rev                 | AGCCCCAGCCTTCTCCA       |

Abbreviations: IL-1 $\beta$ : interleukin-1 $\beta$ ; IL-6: interleukin-6; TNF- $\alpha$ : tumor necrosis factor- $\alpha$ ; GAPDH: glyceraldehyde 3-phosphate dehydrogenase.
